# Supplementary material
Source: publisher figshare collection journal article supplement (https://gsapubs.figshare.com/ndownloader/files/37379842)
Supplement: Supplementary file 1 [file 37379842]

## Sheet: Sheet1
	Mixing model in Fig. 11
1. Partial melting of garnet peridotite and decarbonated eclogite
	Fractional melting equation: CL = C0 / F * (1 - (1 - F) ^ (1 / D)) (Shaw, 1970)
	Mineral proportion of garnet peridotite and decarbonated eclogite modifed after Jourdan et al., 2007 and Ravna et al., 2017, respectively
	Mineral partition coefficients of Zn from Le Roux et al., 2015 and Sweeney et al., 1995
	Zn concentration and isotopic value from Palme and O'Neill, 2007; Sossi et al., 2018; Ravna et al., 2017; Pichat et al., 2003; Gale et al., 2013; Inglis et al., 2017
	Zn isotope fractionation factors from Sossi et al., 2018; McCoy-West et al., 2018 and Beunon et al., 2020
	The proportion of ghost carbonate component in decarbonated eclogite vary from 5–30%, based on the discovered carbonated eclogite in Tarim (Tao et al., 2014)
	garnet peridotite source composition		Zn (ppm)	d66Zn
			53.5	0.16
	Mode	garnet peridotite	DZn	Δ66Zn
	olivine	0.66	0.96	-0.17
	opx	0.2	0.45	-0.17
	cpx	0.09	0.33	-0.17
	garnet	0.05	0.21	-0.2
	Bulk D		0.7638
	αbulk			1.00007
	Partial melting degree		Zn (ppm)	Δ66Zn
	0.01		69.936	0.228401
	0.02		69.8269	0.227484
	0.03		69.7173	0.22656
	0.04		69.6072	0.225629
	0.05		69.4966	0.224692
	average		69.7168	0.226553
	decarbonated eclogite source composition		Zn (ppm)	d66Zn		decarbonated eclogite source composition		Zn (ppm)	d66Zn		decarbonated eclogite source composition		Zn (ppm)	d66Zn		decarbonated eclogite source composition		Zn (ppm)	d66Zn
			116	0.302				116	0.334				116	0.398				116	0.462
	Mode	decarbonated eclogite	DZn	Δ66Zn		Mode	decarbonated eclogite	DZn	Δ66Zn		Mode	decarbonated eclogite	DZn	Δ66Zn		Mode	decarbonated eclogite	DZn	Δ66Zn
	cpx	0.6	0.675	-0.17		cpx	0.575	0.675	-0.17		cpx	0.525	0.675	-0.17		cpx	0.475	0.675	-0.17
	garnet	0.35	0.892	-0.2		garnet	0.325	0.892	-0.2		garnet	0.275	0.892	-0.2		garnet	0.225	0.892	-0.2
	ghost' carbonate	0.05	0.23	0.16		ghost' carbonate	0.1	0.23	0.16		ghost' carbonate	0.2	0.23	0.16		ghost' carbonate	0.3	0.23	0.16
	Bulk D		0.7287			Bulk D		0.701025			Bulk D		0.645675			Bulk D		0.590325
	αbulk			1.00007		αbulk			1.00006		αbulk			1.00005		αbulk			1.00003
	Partial melting degree		Zn (ppm)	d66Zn		Partial melting degree		Zn (ppm)	d66Zn		Partial melting degree		Zn (ppm)	d66Zn		Partial melting degree		Zn (ppm)	d66Zn
	0.1		156.16	0.358871		0.1		161.873	0.38458		0.1		174.65	0.436159		0.1		189.612	0.488001
2. Mixing of melt derived from garnet peridotite and decarbonated eclogite
	Mixing equation of Zn content: Cmix = Xgarnet peridotite * CZn in garnet peridotite + Xdecarbonated eclogite * CZn in decarbonated eclogite
	Mixing equation of d66Zn: Cmix = (Xgarnet peridotite * CZn in garnet peridotite * d66Zn garnet peridotite + Xdecarbonated eclogite * CZn in decarbonated eclogite * d66Zn decarbonated eclogite) / Cmix
proportion of melt from decarbonated eclogite		5% 'ghost' carbonate			10% 'ghost' carbonate			20% 'ghost' carbonate			30% 'ghost' carbonate
		Zn (ppm)	d66Zn		Zn (ppm)	d66Zn		Zn (ppm)	d66Zn		Zn (ppm)	d66Zn
	0	69.7168	0.226553		69.7168	0.226553		69.7168	0.226553		69.7168	0.226553
	0.1	78.3611	0.252922		78.9324	0.258961		80.2102	0.272193		81.7063	0.287226
	0.2	87.0054	0.274051		88.1481	0.284593		90.7035	0.307273		93.6958	0.332371
	0.3	95.6496	0.291361		97.3637	0.305372		101.197	0.335078		105.685	0.367274
	0.4	104.294	0.305801		106.579	0.322558		111.69	0.357658		117.675	0.395064
	0.5	112.938	0.318031		115.795	0.337008		122.184	0.37636		129.664	0.417714
	0.6	121.582	0.328522		125.011	0.349328		132.677	0.392103		141.654	0.436531
	0.7	130.227	0.33762		134.226	0.359956		143.17	0.405539		153.643	0.452411
	0.8	138.871	0.345586		143.442	0.369219		153.664	0.41714		165.633	0.465992
	0.9	147.515	0.352618		152.658	0.377363		164.157	0.427258		177.622	0.477739
	1	156.16	0.358871		161.873	0.38458		174.65	0.436159		189.612	0.488001
References
Jourdan, F., Bertrand, H., Schärer, U., Blichert-Toft, J., Féraud, G. and Kampunzu, A.B., 2007. Major and trace element and Sr, Nd, Hf, and Pb isotope compositions of the Karoo large igneous province, Botswana–Zimbabwe: lithosphere vs mantle plume contribution. Journal of Petrology, 48(6), pp.1043-1077.
Ravna, E.K., Zozulya, D., Kullerud, K., Corfu, F., Nabelek, P.I., Janák, M., Slagstad, T., Davidsen, B., Selbekk, R.S. and Schertl, H.P., 2017. Deep-seated carbonatite intrusion and metasomatism in the UHP Tromsø Nappe, Northern Scandinavian Caledonides—A natural example of generation of carbonatite from carbonated eclogite. Journal of Petrology, 58(12), pp.2403-2428.
Shaw, D.M., 1970. Trace element fractionation during anatexis. Geochimica et Cosmochimica Acta, 34(2), pp.237-243.
Le Roux, V., Dasgupta, R. and Lee, C.T.A., 2015. Recommended mineral-melt partition coefficients for FRTEs (Cu), Ga, and Ge during mantle melting. American Mineralogist, 100(11-12), pp.2533-2544.
Sweeney, R.J., Prozesky, V. and Przybylowicz, W., 1995. Selected trace and minor element partitioning between peridotite minerals and carbonatite melts at 18–46 kb pressure. Geochimica et Cosmochimica Acta, 59(18), pp.3671-3683.
Palme, H. and O'Neill, H.S.C., 2003. Cosmochemical estimates of mantle composition. TrGeo, 2, p.568.
Sossi, P.A., Nebel, O., O'Neill, H.S.C. and Moynier, F., 2018. Zinc isotope composition of the Earth and its behaviour during planetary accretion. Chemical Geology, 477, pp.73-84.
Pichat, S., Douchet, C. and Albarède, F., 2003. Zinc isotope variations in deep-sea carbonates from the eastern equatorial Pacific over the last 175 ka. Earth and Planetary Science Letters, 210(1-2), pp.167-178.
Gale, A., Dalton, C.A., Langmuir, C.H., Su, Y. and Schilling, J.G., 2013. The mean composition of ocean ridge basalts. Geochemistry, Geophysics, Geosystems, 14(3), pp.489-518.
Inglis, E.C., Debret, B., Burton, K.W., Millet, M.A., Pons, M.L., Dale, C.W., Bouilhol, P., Cooper, M., Nowell, G.M., McCoy‐West, A.J. and Williams, H.M., 2017. The behavior of iron and zinc stable isotopes accompanying the subduction of mafic oceanic crust: A case study from W estern A lpine ophiolites. Geochemistry, geophysics, geosystems, 18(7), pp.2562-2579.
McCoy-West, A.J., Fitton, J.G., Pons, M.L., Inglis, E.C. and Williams, H.M., 2018. The Fe and Zn isotope composition of deep mantle source regions: Insights from Baffin Island picrites. Geochimica et Cosmochimica Acta, 238, pp.542-562.
Beunon, H., Mattielli, N., Doucet, L.S., Moine, B. and Debret, B., 2020. Mantle heterogeneity through Zn systematics in oceanic basalts: Evidence for a deep carbon cycling. Earth-Science Reviews, p.103174.
Tao, R., Zhang, L., Fei, Y. and Liu, Q., 2014. The effect of Fe on the stability of dolomite at high pressure: Experimental study and petrological observation in eclogite from southwestern Tianshan, China. Geochimica et Cosmochimica Acta, 143, pp.253-267.
